# Supplementary material for: The prognostic value of patient-reported outcomes in allogeneic hematopoietic stem cell transplantation: exploratory analysis of a randomized nutrition intervention trial
Source: Springer Nature journal article supplement (doi:10.1007/s00277-023-05149-x), 2023-03-03
Supplement: MOESM1 [file 24091550]

Annals of Hematology, Supplementary Information

**The prognostic value of patient-reported outcomes in allogeneic hematopoietic stem cell transplantation: exploratory analysis of a randomized nutrition intervention trial**

**Anne Marte Gudmundstuen, Fabio Efficace, Geir Erland Tjønnfjord, Kristin Joan Skaarud, Francesco Cottone, Marianne Jensen Hjermsstad and Per Ole Iversen**

Correspondence: Anne Marte Gudmundstuen, Department of Haematology, Oslo University Hospital, P.O. Box 4950 Nydalen, NO-0424 OSLO, Norway. E-mail: [a.m.gudmundstuen@medisin.uio.no](mailto:a.m.gudmundstuen@medisin.uio.no)

**Supplementary table 1.** Univariable analyses for 1-year overall survival: Clinical and sociodemographic variables

| <b>Variables</b>                     | <b>Hazard ratio</b> | <b>95% Confidence interval</b> |       | <b>P-value</b> |
|--------------------------------------|---------------------|--------------------------------|-------|----------------|
| Male gender                          | 1.031               | 0.516                          | 2.059 | 0.931          |
| Age                                  | 1.009               | 0.984                          | 1.036 | 0.480          |
| Having children                      | 0.727               | 0.364                          | 1.452 | 0.366          |
| Being married                        | 0.0551              | 0.514                          | 2.164 | 0.884          |
| Living alone                         | 1.702               | 0.741                          | 3.909 | 0.210          |
| High education                       | 0.905               | 0.448                          | 1.829 | 0.781          |
| Working full-time                    | 0.712               | 0.275                          | 1.838 | 0.482          |
| Group (ref=intervention)             | 1.103               | 0.563                          | 2.160 | 0.776          |
| ECOG (ref=1)                         | 0.363               | 0.050                          | 2.649 | 0.317          |
| Related donor type                   | 1.170               | 0.559                          | 2.446 | 0.677          |
| Stem-cell source<br>(ref=peripheral) | 1.452               | 0.727                          | 2.901 | 0.290          |
| Sex mismatch (ref=yes)               | 1.861               | 0.907                          | 3.820 | 0.090          |
| Patient CMV (ref=positive)           | 0.959               | 0.434                          | 2.118 | 0.918          |
| Donor CMV (ref=positive)             | 0.862               | 0.435                          | 1.706 | 0.669          |
| EBMT score                           | 1.288               | 0.994                          | 1.669 | 0.056          |
| HCT-CI score                         | 1.326               | 1.077                          | 1.632 | 0.008          |
| High risk                            | 2.190               | 0.906                          | 5.294 | 0.082          |
| BMI                                  | 1.059               | 0.980                          | 1.145 | 0.147          |

ECOG Eastern Cooperative Oncology group, ref reference, CMV cytomegalovirus, EBMT European Bone Marrow Transplantation risk score, HCT-CI Hematopoietic Cell Transplantation Comorbidity Index, BMI body mass index.

**Supplementary table 2:** Univariable analyses for 1-year overall survival: Patient-reported outcomes from the EORTC QLQ-C30

| <b>Variables</b>                                  | <b>Hazard ratio</b> | <b>95% Confidence interval</b> |       | <b>P-value</b> |
|---------------------------------------------------|---------------------|--------------------------------|-------|----------------|
| <b>Physical functioning and Global QoL scales</b> |                     |                                |       |                |
| Physical functioning                              | 0.991               | 0.974                          | 1.009 | 0.316          |
| Role functioning                                  | 0.992               | 0.981                          | 1.002 | 0.114          |
| Cognitive functioning                             | 1.006               | 0.990                          | 1.022 | 0.456          |
| Social functioning                                | 0.992               | 0.980                          | 1.004 | 0.190          |
| Emotional functioning                             | 1.012               | 0.992                          | 1.032 | 0.248          |
| Global Health Status/QoL                          | 0.984               | 0.968                          | 0.999 | 0.038          |
| <b>Symptoms</b>                                   |                     |                                |       |                |
| Fatigue                                           | 1.007               | 0.994                          | 1.021 | 0.285          |
| Nausea/Vomiting                                   | 0.983               | 0.958                          | 1.009 | 0.204          |
| Pain                                              | 1.007               | 0.992                          | 1.022 | 0.388          |
| Dyspnea                                           | 1.008               | 0.997                          | 1.019 | 0.166          |
| Appetite loss                                     | 0.990               | 0.974                          | 1.006 | 0.208          |
| Sleep disturbances                                | 0.999               | 0.989                          | 1.010 | 0.915          |
| Constipation                                      | 0.991               | 0.974                          | 1.009 | 0.319          |
| Diarrhea                                          | 0.990               | 0.972                          | 1.009 | 0.316          |
| Financial difficulties                            | 1.002               | 0.991                          | 1.013 | 0.676          |

**Supplementary table 3.** Univariable analyses for 1-year non-relapse mortality: Clinical and sociodemographic variables

| <b>Variable</b>                      | <b>Odds ratio</b> | <b>95% Confidence interval</b> |        | <b>P-value</b> |
|--------------------------------------|-------------------|--------------------------------|--------|----------------|
| Male gender                          | 0.925             | 0.346                          | 2.474  | 0.877          |
| Age                                  | 1.043             | 1.002                          | 1.085  | 0.038          |
| Having children                      | 1.096             | 0.385                          | 3.123  | 0.864          |
| Being married                        | 0.704             | 0.261                          | 1.898  | 0.489          |
| Living alone                         | 4.210             | 1.384                          | 12.809 | 0.011          |
| High education                       | 1.386             | 0.524                          | 3.666  | 0.510          |
| Working full-time                    | 1.463             | 0.471                          | 4.549  | 0.511          |
| Group (ref=intervention)             | 0.835             | 0.318                          | 2.196  | 0.715          |
| ECOG (ref=1)                         | 0.677             | 0.079                          | 5.827  | 0.723          |
| Related donor type                   | 0.683             | 0.209                          | 2.231  | 0.528          |
| Stem-cell source<br>(ref=peripheral) | 3.918             | 1.221                          | 12.567 | 0.022          |
| Sex mismatch (ref=yes)               | 2.073             | 0.731                          | 5.878  | 0.170          |
| Patient CMV (ref=positive)           | 0.932             | 0.306                          | 2.844  | 0.902          |
| Donor CMV (ref=positive)             | 0.649             | 0.238                          | 1.767  | 0.397          |
| EBMT score                           | 2.082             | 1.364                          | 3.178  | 0.001          |
| HCT-CI score                         | 1.367             | 0.988                          | 1.890  | 0.059          |
| High risk                            | 1.725             | 0.423                          | 7.040  | 0.447          |
| BMI                                  | 1.094             | 0.979                          | 1.223  | 0.114          |

ECOG Eastern Cooperative Oncology group, ref reference, CMV cytomegalovirus, EBMT European Bone Marrow Transplantation risk score, HCT-CI Hematopoietic Cell Transplantation Comorbidity Index, BMI body mass index.

**Supplementary table 4.** Univariable analyses for 1-year non-relapse mortality: Patient-reported outcomes from the EORTC QLQ-C30

| <b>EORTC QLQ-C30</b>                              | <b>Odds ratio</b> | <b>95% Confidence interval</b> |       | <b>P-value</b> |
|---------------------------------------------------|-------------------|--------------------------------|-------|----------------|
| <b>Physical functioning and global QoL scales</b> |                   |                                |       |                |
| Physical functioning                              | 0.988             | 0.963                          | 1.013 | 0.344          |
| Role functioning                                  | 0.996             | 0.981                          | 1.010 | 0.568          |
| Cognitive functioning                             | 1.004             | 0.982                          | 1.026 | 0.714          |
| Social functioning                                | 1.003             | 0.986                          | 1.019 | 0.755          |
| Emotional functioning                             | 1.012             | 0.984                          | 1.041 | 0.398          |
| Global health Status/QoL                          | 0.975             | 0.953                          | 0.998 | 0.034          |
| <b>Symptoms</b>                                   |                   |                                |       |                |
| Fatigue                                           | 1.010             | 0.991                          | 1.030 | 0.296          |
| Nausea/vomiting                                   | 0.967             | 0.924                          | 1.011 | 0.138          |
| Pain                                              | 1.015             | 0.993                          | 1.038 | 0.176          |
| Dyspnea                                           | 1.002             | 0.985                          | 1.020 | 0.788          |
| Appetite loss                                     | 0.970             | 0.941                          | 1.000 | 0.050          |
| Sleep disturbances                                | 1.001             | 0.986                          | 1.017 | 0.897          |
| Constipation                                      | 0.989             | 0.964                          | 1.015 | 0.398          |
| Diarrhea                                          | 1.000             | 0.977                          | 1.024 | 0.989          |
| Financial difficulties                            | 0.997             | 0.980                          | 1.015 | 0.758          |
